# Supplementary material for: Value of seasonal flow forecasts for enhancing reservoir operation and drought management in South Korea
Source: Copernicus journal article supplement (doi:10.5194/egusphere-2024-1985), 2024-07-09
Supplement: Supplementary file [file egusphere-2024-1985-AC3-supplement.pdf]

## Reply To Referee#1 Comments

We thank referee for the valuable comments. Our replies to all comments are shown in blue and the original referee's comments are shown in black.

In this manuscript, the authors present a comparison between various ensemble forecasts and deterministic scenarios for informing reservoir operations for two reservoir systems and three drought events in South Korea. The evaluate gains in terms of the forecast accuracy and skill, and in terms of the operational value related to storage and supply. They additionally test the sensitivity of the results to methodological choices, decisions usually implicitly made in research studies. The research questions are interesting and the manuscript is overall clear and concise. Below are a few comments that I hope will be helpful to revise the manuscript for publication.

Thank you for your valuable and insightful comments to our paper. We are committed to address them in our revision.

### General points:

-A clarification of the methods is needed, especially regarding the lead times and the decision-making time steps. For example, how can a decision be made every two months (i.e., bimonthly) for a forecast with two months lead time? Including a graphic illustrating the timeline between the forecast generation and the last decision made for a single water year would be really helpful, I think.

→ Thank you for your comment. We will revise the text to improve clarity and, since it is difficult to explain with text alone, we will also include a conceptual figure, as illustrated below, in the supplementary material to provide more detailed insights into the methodologies.

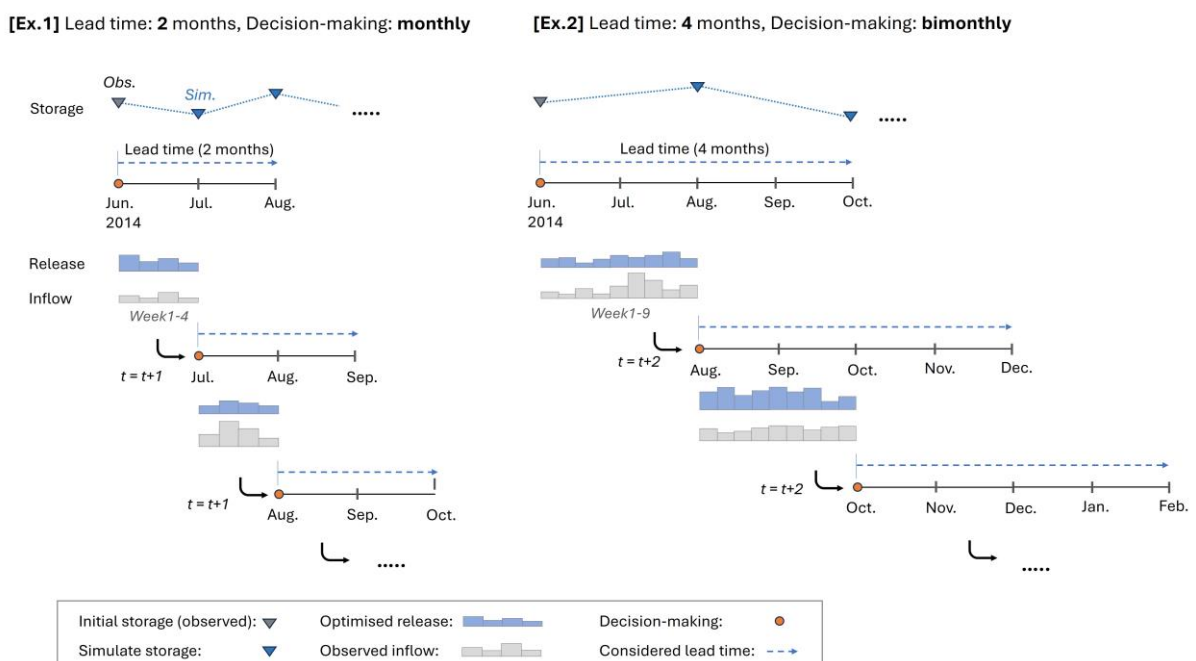

Figure R1. Conceptual examples of our continuous reservoir simulations (2014-2016) with various experimental choices.

-More reflection is needed on the plausible physical explanations for some of the results to add some depth. For example, see my comment on L427-429.

→ We agree with you and are aware that this is very important point. However, it was challenging to derive physical explanations from our results confined to 2 reservoir systems and three drought events. This limitation is discussed in 5.2 'limitations and directions for future research'. For further details, please refer to the answer for L427-429 on page 11.

-Please discuss the shortcomings associated with evaluating only two attributes of the forecast performance (i.e., accuracy and skill). Calculating more attributes, like correlation, variance and reliability, would give a fuller picture, which could impact the conclusion you draw on L448-450 regarding the link between forecast performance and value.

→ We agree with you and we will add a sentence in the Discussion to raise this point, for example saying: "In this study we only evaluated two attributes of the forecast performance (accuracy and skill) but other attributes may also be considered, such as correlation, variance and reliability, which could return different outcomes in terms of the comparison between forecasts products and therefore the relationship between performance (i.e. the level of agreement between forecasts and observations) and value (the usefulness to inform decisions).

-Are the codes you developed for the evaluation shared anywhere for others to follow your approach more easily? If not, please consider making them available.

→ We are currently organizing the code developed in this study for evaluation purposes and plan to make it publicly available as part of the iRONS python package (<https://ironstoolbox.github.io/>). We will add the link to access our code in the revised version of the manuscript.

#### **Specific points:**

-L23: In the abstract, please specify what key choices you're looking at.

→ Yes, we will specify the types of key choices in the abstract.

-L113-114: I would move this last sentence to the conclusions instead as it seems a bit out of place in the introduction.

→ We agree with you and will remove the last sentence from the introduction.

-L122-130: Could you give a brief description of the hydrological regime of both regions? E.g., When are the peak flows? What drives runoff generation?

→ They share similar hydrological regime with peak flows in July or August due to monsoon or typhoon. We will include a brief description of the hydrological regimes in the manuscript.

-L140: On L39 the dates for this event are 2013-2016. Please clarify.

→ In national perspective, 2013-2017 is regarded as drought event (Line-39, K-water, 2018). However, for the two studied reservoir systems, total inflow in 2013 was above average and the drought event lasted until 2016 (Line 140). To avoid confusion, we will unify the drought period as 2014-2016 in the manuscript, aligning it with our simulation period.

-L159-162: What is the initialization frequency of the forecasts and what time period is covered by the forecasts you generated for this study?

→ Forecasts are initialised every month and the time period covered by the forecasts are the same as studied drought events (2001-2002, 2008-2009, 2014-2016). We will add details in the manuscript.

-L162-163: The time period based on which the correction factors are calculated overlaps with the drought events in 2001-2002 and 2008-2009. This could be an unfair advantage for these events. Please clarify. Same comment for the ESP generation explained on L186.

→ Thank you for this comment. We used the time period 1993-2010 for generating the bias correction factors because of concerns about data sufficiency. For example, when analysing drought events from 2001 to 2002, only 7 years of data from 1993 to 2000 would be available if we tried to avoid overlap with the event period. We agree that incorporating overlapped years could potentially provide unfair advantages, but using an insufficient amount of data for generating bias correction factors can also lead to significant issues. Johnson and Sharma (2012) and Maraun et al. (2010) suggest that larger datasets help ensure more accurate bias corrections by capturing the variability of the data better and reducing the influence of outliers. By fixing the time period from 1993 to 2010, we ensure a more reliable and robust calculation. We have applied the same time period constraint to the ESP calculation until 2010 to maintain consistency of our study. We will clarify this in the manuscript.

-L167: Can you briefly list the four different forecasts/scenarios here as well?

→ Yes, we will add brief list of the forecasts and scenarios here.

-L172-173: What is the temporal aggregation of the forecasts/scenarios, based on which the decisions are made? E.g., Weekly, monthly, etc.

→ All forecasts and scenarios are initially generated at a daily time scale, but in optimising and simulating reservoirs, we aggregated this data to a weekly time scale. Decisions were made every month (monthly) or every two month (bimonthly) mimicking the practical reservoir operations. We will clarify this temporal aggregation detail in the manuscript.

-L173: Please specify how much time there is in between each decision.

→ We will specify decision making time steps which are 1 and 2 months.

-L174: Is the process iteratively conducted at the start of each month? The frequency is unclear.

→ This reservoir optimisation and simulation process is iteratively conducted every month (for monthly decision-making) or every two months (for bimonthly decision-making) throughout the simulation period (e.g. Jun. 2014 to Sep. 2016) (refer to Figure R1). We will clarify this in the sentence.

-Figure 2: Very nice graphic!

→ Thank you.

->You could refer the readers to each figure compartment being described at the start of each subsection below.

→ Yes, it would be a good idea. We will add this information in the manuscript.

->Could you specify whether bimonthly refers to twice a month or every two months please?

→It means every two months as illustrated in Figure R1, and we will clarify this in the text and the Figure 2.

->It would be useful to add a short section (3.1.4) for the reservoir simulation step, both to have coherence between the numbering of the sections and the boxes in the figure (i.e., step 1 is explained in 3.1.1, step 2 in 3.1.2, etc.) and to provide some information on how this is done (e.g., I don't quite understand how decisions are made at different time steps with forecasts that cover different lead times and how often a new forecast is produced).

→We thank you for this advice and will add section 3.1.4 for the reservoir simulation step. In this section, we will include a reference to the Figure R1 (shown above).

-L178-193: Please provide more information about the forecasts' generation, with regards to the: simulation periods, forecast time steps, initialization dates, lead time (please also explain how you define lead time with a concrete example as different research groups define them differently, e.g., lead month 0 vs. 1), ensemble size for the SFF.

→ Flow scenarios and forecasts have a daily time step; the simulation periods are those specified in Figure 1. We generated and applied lead times of 2, 4, and 6 months from current time step (i.e. 2 months of lead time corresponds to the next 60 days). The SFF ensemble includes 25 members until 2016, and 51 members since 2017. We will add these details in the manuscript.

-L181-182: Operationally, with what lead times and at what time steps are the decisions made currently by K-water? This would help contextualize your methodological decisions.

→ K-water revises their weekly release schedule every month, utilizing a 20-year return period drought scenario for the upcoming 3 to 6 months. We will include this information in the manuscript.

-L185-189: Could you comment on the difference in ensemble sizes between the ESP and the SFF and the potential impacts on the performance evaluation?

→ Followed by your comment (L178-193), the ensemble sizes of ESP (45) and SFFs (25 until 2016, 51 since 2017) will be added in the manuscript. However, evaluating the impact of the ensemble size is out of the scope of this study given the limited number of drought events. A previous study conducted by Peñuela et al. (2020) showed that when the number of ensembles decreases below 10, the forecast value can be affected.

-L186-187: Could you give a bit more information about the Tank hydrological model, such as its spatial resolution, how it was calibrated, how the initial conditions were obtained, and what its performance in simulation is for the basins considered here.

→ We acknowledge the importance of this information and will add information about the model to this manuscript. However, we will keep this brief since our previous paper published in Hydrology and Earth System Sciences (Lee et al., 2024) provides comprehensive details on this.

-L190: I would call the bias correction method a post-processing method rather than a downscaling method, to avoid confusions with downscaling methods used to refine the information granularity.

→ We agree with you and will replace downscale with post-processing.

-L210: Please provide the range of CRPS values. Additionally, at zero, the performance of the SFF would be considered the same as that of the ESP, so there would be no skill associated. Please clarify.

→ We will include additional information in the manuscript about the range of CRPS values (from 0 to  $\infty$ ) and the meaning of a zero CRPS.

-L233-234: Are these objectives the ones used to generate the Pareto front? Please clarify.

→ Yes, they are used to generate the Pareto front. We will clarify this in the manuscript.

-L233-239: How are the ensembles considered in equations 5 and 6? Is the ensemble median used?

→ We used the mean value of SSD and SVD across ensemble members. See also our reply below to the comment about L.251-252.

-L244: Would it make more sense to calculate and present the forecast accuracy and skill for weekly aggregations rather than monthly, to match the aggregation periods of the SSD and SVD calculations?

→ We appreciate your suggestion; however, we disagree with presenting forecast accuracy and skill on a weekly basis. A monthly comparison, as shown in Figure 4, provides a more intuitive illustration of how mean error varies with different lead times.

-L251-252: It's unclear to me how various Pareto fronts can be averaged. Are the individual solutions comparable across Pareto fronts or is this an assumption? Please clarify.

→ Thank you for this comment. We realised that our original explanation in the manuscript was confusing. When optimising against ensemble forecasts (i.e. ESP or SFFs), the two objective functions (Eqs. 5 and 6, i.e. SSD and SVD) are evaluated against each ensemble member, and the average is taken as the final objective value and passed on to the NSGA-II optimiser. We will clarify this sentence in the manuscript.

-L254: I thought there were one million solutions, as per L249-250?

→ No, the number of solutions on the Pareto front is 100. We realised though that L249-250 are confusing and will reformulate them as: "We set the number of solutions to be evolved by the NSGA-II algorithm (so called "population" size) to 100, and the number of iterations to 100000, leading to a total of ten million model evaluations for each optimisation run"

-Figure 3: I would suggest writing out the acronyms (e.g., MCDM, WCD, etc.) in a table footer or in the caption so that the table could be understood as a standalone item.

→ Thank you for this suggestion and we will modify the figure.

-L337-338: Could you give us an indication of, for example, the spread of values and the mean per lead time? Here, interestingly the overall skill increases with increasing lead time. Could you infer some reasons for the skill increasing or decreasing with lead time for the various events and reservoirs in the results?

→ Yes, we will include the mean overall skill for each lead time in the manuscript, which decreases from 54% to 53% and 46% for 2, 4, and 6 months of lead time, respectively. This specific case of Soygang-Chungju for 2014-2016 was unique, and we were unable to identify clear reasons for its exceptional performance.

-Figure 5:

->It might be more coherent with section 3.1.2 to show the storage volume deficit instead of the storage volume.

→ The primary reason for displaying the storage volume instead of the storage volume difference (SVD) is its greater physical interpretability within the context of reservoir operation. We also believe that the SVD can be readily found from the current figure. To enhance clarity, we will incorporate a visual representation of the SVD into the figure (see the modified Figure 5 on page 7).

-> Could you label the dotted red-ish line at the top of each storage volume plot?

→ It represents the storage capacity ( $S_{max}$ ), and we will add a label in the figure (see the modified Figure 5 on page 7).

-L355: Was the wet event captured by the SFF? Knowing this could help explain some of the behaviours we can see in Fig. 5.

→ Yes, the SFFs captured the wet event in July more accurately than deterministic scenarios, as illustrated in Figure R2(a) below, and we agree that this help explains the better reservoir operations performance seen in Fig. 5. We will clarify this point in the manuscript and include this figure in the supplementary material for further reference

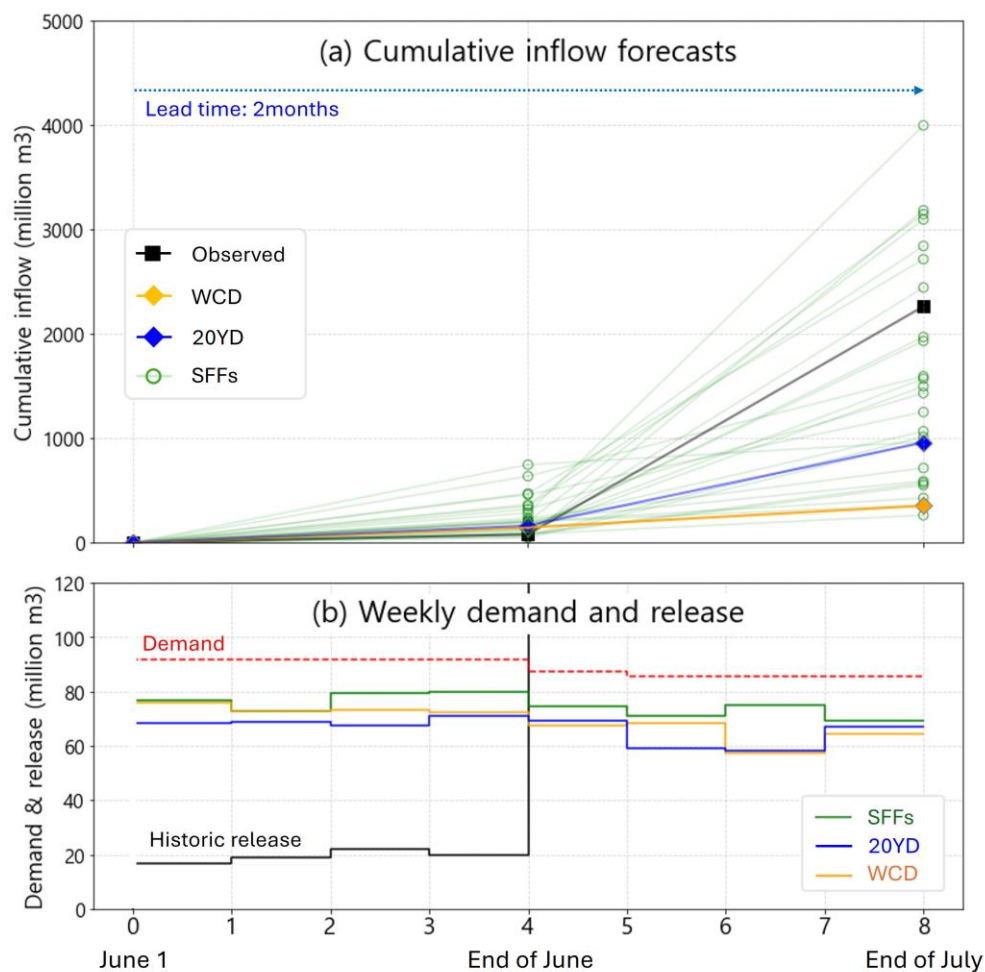

Figure R2. (a) Cumulative flow observation (black square) and forecasts for Soyonggang-Chungju from June to July 2016, using WCD (orange diamond), 20YD (blue diamond), and SFFs (ensemble: hollow green circle, median: red circle). The black square represents the observed cumulative inflow during the same period. (b) Weekly demand and release, following the same colour coding and time period as in (a).

-L355-357: Please expand on how we can see that the deterministic scenarios offer slightly superior results for securing storage volume compared to the ensemble forecasts on the figure. E.g., is the reservoir replenished faster? However, if the SFF knew that there was a rainfall event coming up, couldn't we expect that it recommends filling up the reservoir later to avoid losses linked with an overestimation of the storage by the end of the water year? Then, it wouldn't be fair to say that the deterministic scenarios offer superior results to secure storage volume over the SFF if the reservoir is fuller faster. Please expand on this in your results.

→ We agree with your comment. Since SFFs predict wet future event more accurately than deterministic scenarios, they tend to release more water as seen in Figure R2 (b). We will clarify this point in the manuscript and ensure that we do not imply that deterministic scenarios yield superior results in securing storage volume over the SFFs. Additionally, we will also present the mean storage volume at the end of simulation period across all 48 simulations as shown in Figure 5.

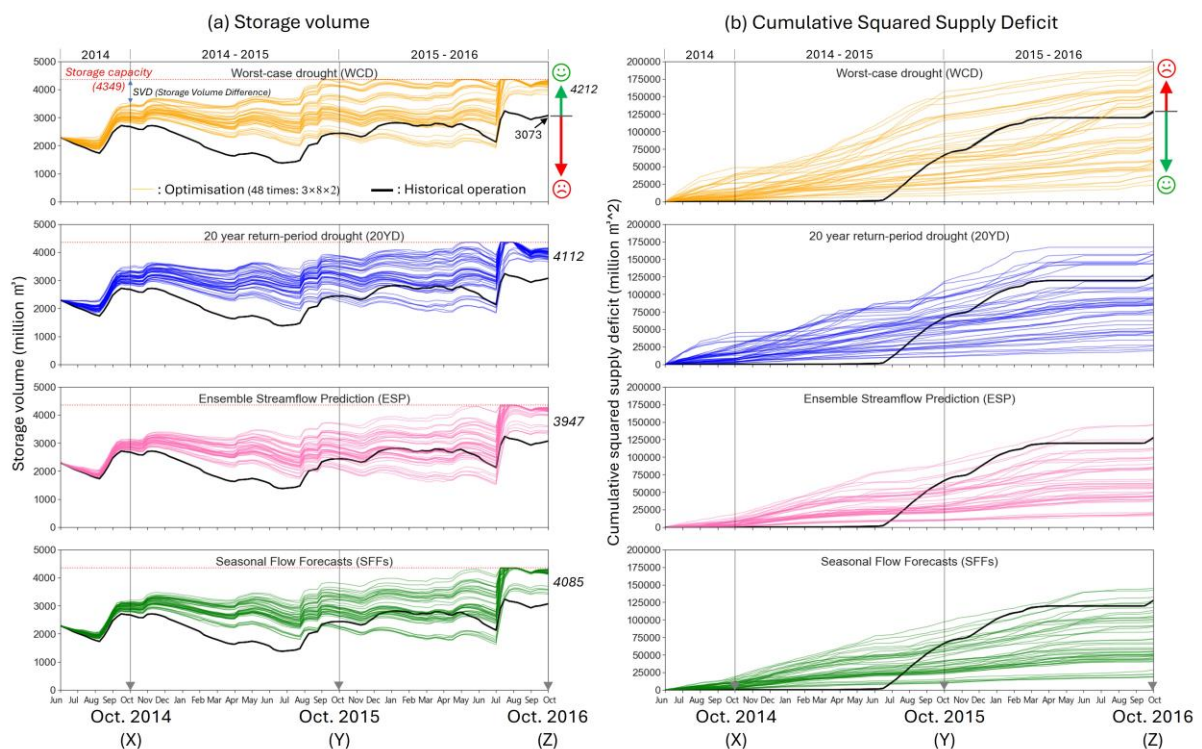

**Figure 5(Modified):** Simulated reservoir operation results for Soyanggang-Chungju from June 2014 to September 2016 in terms of (a) storage volume and (b) cumulative squared supply deficit. From top to bottom, the rows represent simulation results generated by using WCD (orange), 20YD (blue), ESP (pink) and SFFs (green), respectively. Each sub-figure has 48 simulated results (coloured lines, 3 lead times  $\times$  8 MCDM methods  $\times$  2 decision-making time steps) and a single historical operation (black line). The numbers indicated at the right end of Figure 5(a) represent the mean storage volume (million  $m^3$ ) across all 48 simulations at Z (October 1<sup>st</sup> 2016).

-L371: Could the circles count be included somewhere in the text, figure or in a table?

→ Yes, we will add the circles count in the Figure 6 as shown below.

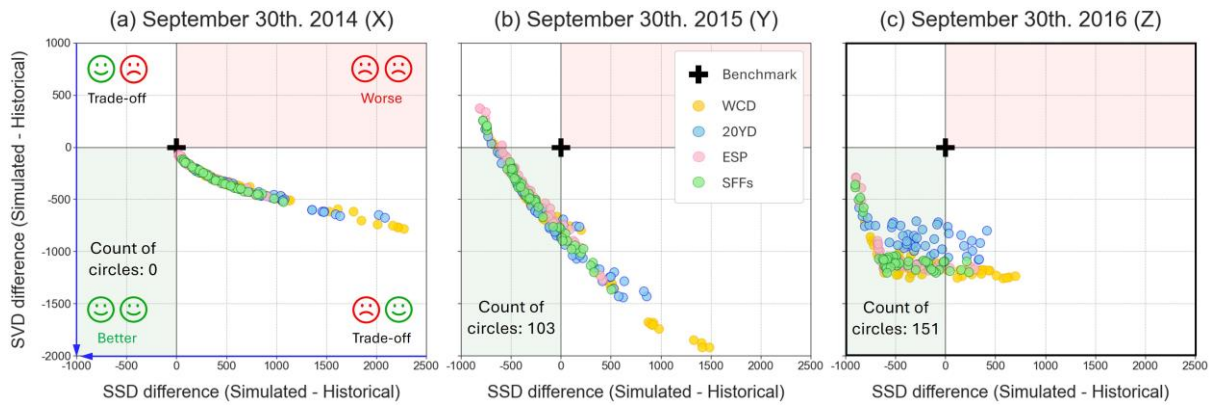

**Figure 6(Modified):** Difference in SSD (x-axis) and SVD (y-axis) between historical operation (black cross) and simulated operations using different flow forecasts/scenarios (coloured circles) in Soyonggang-Chungju during the 2014-2016 drought. Performances are calculated on September 30th in (a) 2014, (b) 2015 and (c) 2016. Each sub-figure shows 48 points for each flow forecast/scenario (WCD, 20YD, ESP, SFFs), resulting from different combinations of key experimental choices (3 lead times  $\times$  8 MCDM methods  $\times$  2 decision-making time steps).

-L380-388: “as the impact of forecast-informed operations accumulates” hints that the value of model-based “dynamic” forecasts has the potential to be even greater for longer drought events. This is a really interesting finding that I think would be nice to include in the discussion.

→ Thank you for this comment. We will add this in the manuscript.

-L389: Could the sensitivity results also be impacted by the different sample sizes of the experimental choices? Bootstrapping could help characterize some of the results’ uncertainty.

→ We thank you for this comment. Following your advice, we applied bootstrapping technique for each experimental choice. We created 3000 bootstrap resamples, each with a size of 20. As shown in Figure R3 below the results show that the impact of sample sizes to sensitivity is relatively small. We will include this figure in the supplementary material.

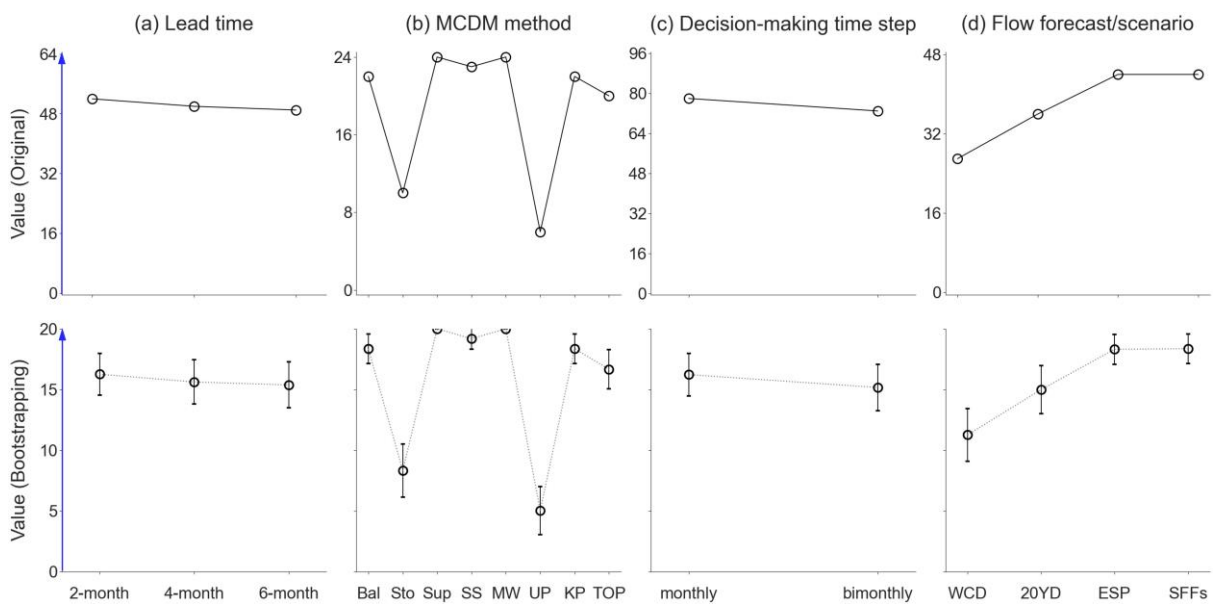

**Figure R3:** (first row) Forecast value (y-axis) against key experimental choices: (a) forecast lead time, (b) MCDM method, (c) decision-making time step and (d) type of flow forecast/scenario for Soyonggang-Chungju reservoir system on September 30th, 2016. (Same figure as Figure 7 in the manuscript). (second row) Bootstrapped forecast value with 20 sample sizes and 3000 iterations.



-L396-397: I think that the forecast value here refers to gains both in terms of the SSD and the SVD, but please remind readers here. Please also remind us here what the benchmark is.

→ Yes, you are right. We will add more explanations in this sentence.

-Figure 8: Should the dates in the legend be September 30th instead of October 1st, to match the legend of Fig. 7?

→ We agree with your point and will modify the legend of Figure 8 and Figure 9.

-L423: Can you make any educated guess with regards to why there is a lot of variability in the MCDM method results with events and reservoir systems?

→ We thank you for this comment, which prompted us to do some further analysis on this point. First, we investigated whether we could order the different MCDM methods in any reasonable way. To achieve this, we plotted the Pareto front for our simulation experiments, with the options selected by different MCDM methods highlighted in different colours (Figure R4 below). This shows a distinct trend whereby the selected solutions always appear in the same ranking moving from left to right of the horizontal axis: first the Supply-prioritized approach, followed by the Knee point, Balanced, TOPSIS, Utopian point and, finally, the Storage-prioritized approach. The variable weighting methods (Simple Selective, Multi Weighting) are the exception, as they do not have a consistent position on the Pareto front (The points not depicted in Figure R4 to simplify illustration).

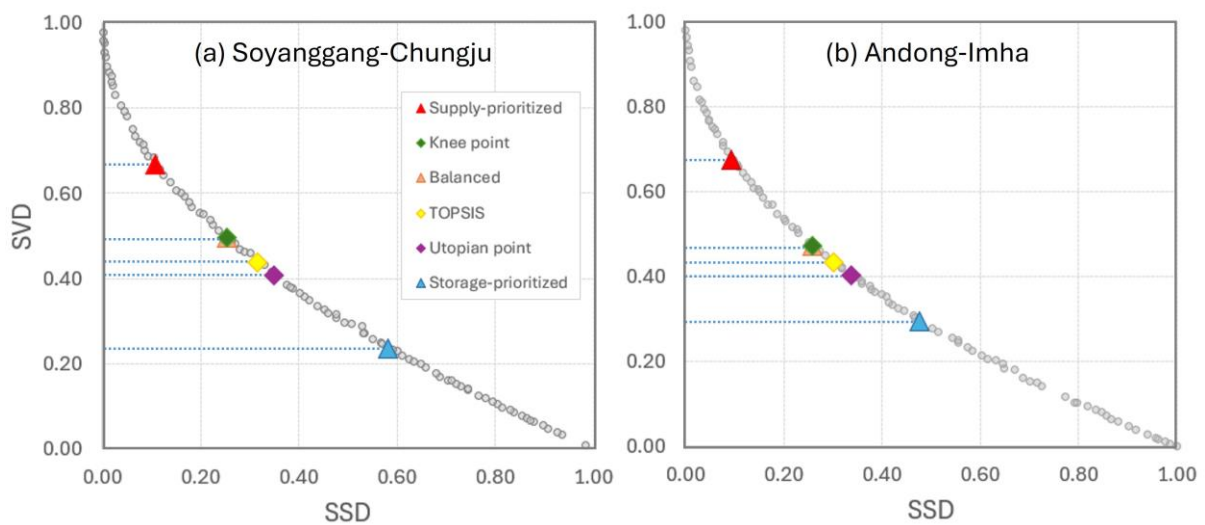

Figure R4. Examples of the Pareto front and decision-making results based on different MCDM methods for Soyonggang-Chungju (a) and Andong-Imha (b) in June 2014.

Having established that the MCDM methods can be ranked in order of relative importance they give to the two objectives, we looked at whether using this ranking would change our visual analysis of the value sensitivity (Figure 8 and 9 in the original manuscript). The result is shown below (Figure R5), where the MCDM methods (x-axis) are reordered from Supply-prioritized (Sup), Knee point(KP), Balanced(Bal), TOPSIS(TOP), Utopian point(UP) and Storage-prioritized (Sto), and isolated two Variable Weighting methods (SS, MW) .

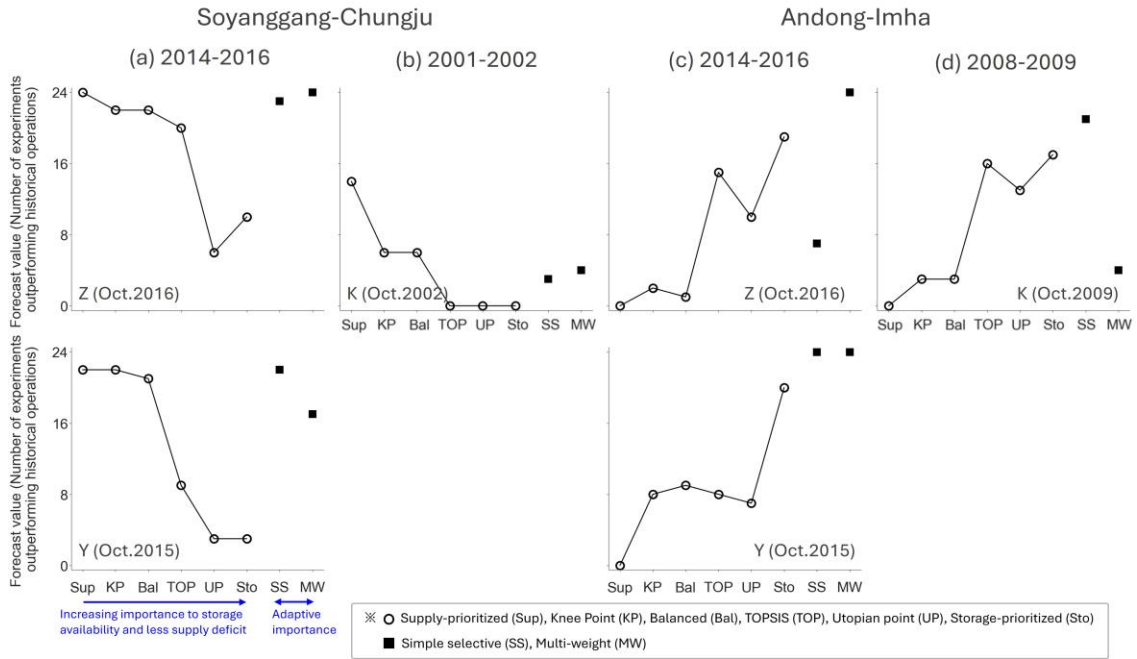

**Figure R5: (First row) Forecast value (y-axis) at the end of different drought events (points at Z, K, Z, M in Figure 1) plotted against MCDM methods. The methods are ordered from left to right with increasing importance to storage availability (hollow circles), along with two variable weighting methods (SS and MW, black squares). (Second row) Same as first row in the middle of drought event (points at Y in Figure 1). Here, the lines are not intended to imply continuity; they are included solely to clarify the direction for visualization purposes.**

Figure R5 shows that, in the Soyanggang-Chungju reservoir system, the forecast value increases as the MCDM method prioritizes avoiding supply deficits. In contrast, the opposite trend is observed in Andong-Imha. This discrepancy is closely linked to the characteristics of the drought events, as illustrated in Figure R6 below.

**Soyanggang-Chungju: Drought cases conclude with a significant wet event**

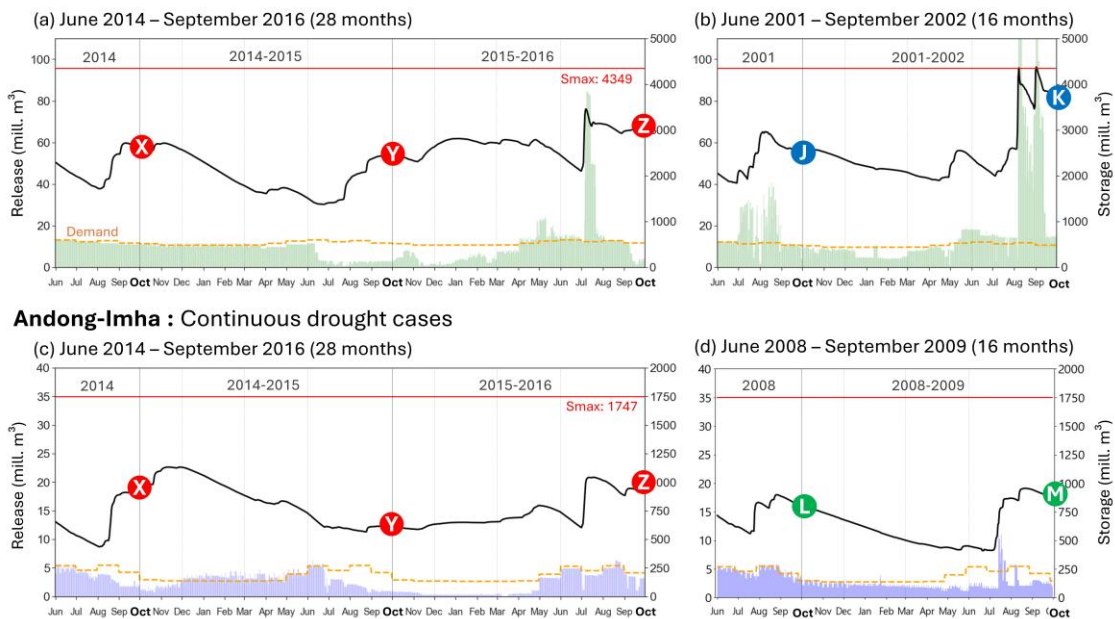

**Figure R6: Daily reservoir operation records for the studied drought events (K-water, 2023). Points X, Y, Z, J, K, L, M represent the ends of the hydrological years (September 30th) which will be used as points for forecast value assessment.**

For instance, the more emphasis placed on supply deficit, the higher the value we can achieve when the drought event concludes with a significant wet event (Soyanggang-Chungju, Figure R6(a, b)). This is because the effect of weighting storage availability is counteracted by the natural replenishment of storage from a wet event that occurs at the end of the simulation period. In contrast, MCDM methods that emphasize storage availability tend to achieve higher values when the drought event continues (Andong-Imha, Figure R6(c, d)).

We will address this in Section 5 'Discussion' and add the figures (R4-6) in the manuscript and supplementary material.

-L427-429: Why are we seeing those differences in the forecast value between the two regions? Does that somehow correlate with the skill of the seasonal meteorological forecasts in those regions or with how decisions were made historically? And what could explain the higher value of the SFF for the earlier event in the Soyanggang-Chungju reservoir system?

→ This is an important point. However, since we analysed only two reservoir systems and three drought events, it is also difficult to clearly explain why there are performance gaps between the two reservoir systems. We believe that further studies are required to clarify this issue. This limitation is discussed in section 5.2 Limitations and directions for future research (L526-530).

-L429-430: Why does increasing lead time lead to higher value?

→ We infer that this is due to the longer horizon of reliable future flow, which can provide operational benefits. However, the relationship between lead time and value is not strong, as indicated by the flow scenarios/forecasts (Figure 8(d)), and one of our results (Soyanggang-Chungju, 2016) shows an opposite trend. Therefore, we first need to clarify their relationship through further studies and then investigate the underlying reasons. We will clarify this point in the manuscript in Discussion section.

-L434-435: Please clarify in the text (and in the caption) that the y axis shows the value tallied over the 8 MCDM methods.

→ Yes. We will clarify this in the manuscript and caption.

-Figure 9: I think that the lines are a bit distracting in this figure. Could they be removed, with four different symbols used instead to represent the different events and reservoir systems?

→ We will modify the figure as shown below

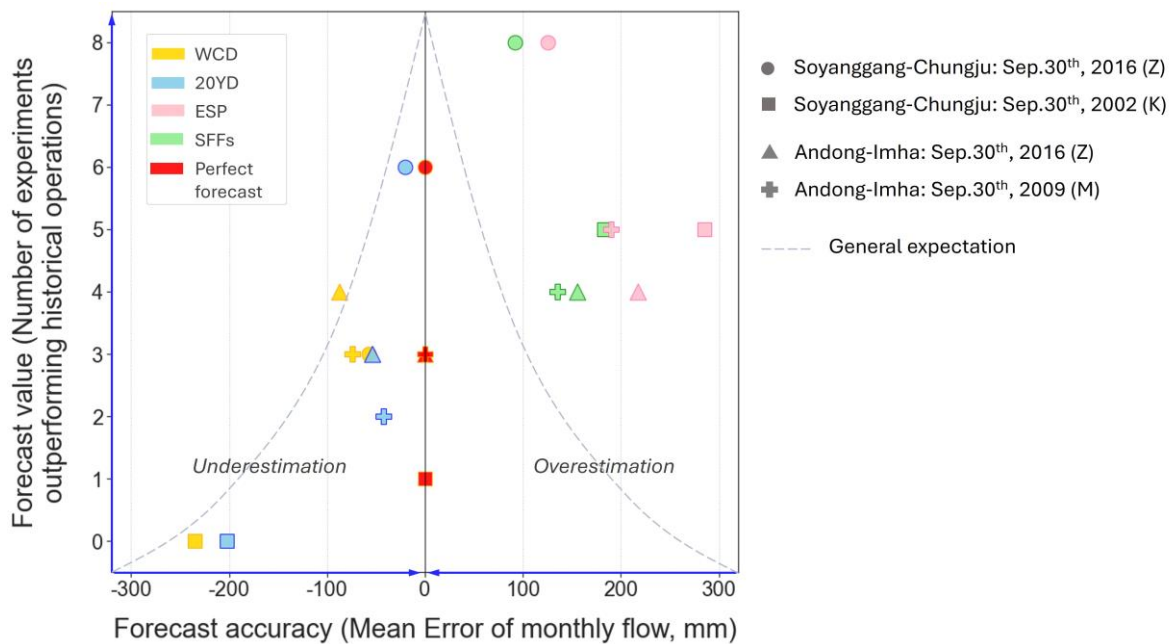

Figure 9(Modified): Relationship between forecast accuracy (Mean Error of monthly flow, x-axis) and value tallied over the 8 MCDM methods (y-axis) at the end of the simulation period for different drought events (2002, 2009 and 2016) at Soyanggang-Chungju and Andong-Imha reservoir systems. For each event and system, the figure shows five points corresponding to simulated forecast-informed operations using different forecasts/scenarios (orange: WCD, blue: 20YD, pink: ESP, green: SFFs, red: perfect forecast). The perfect forecast scenario was generated using actual flow observations as future forecasts. The direction of the blue arrows indicates higher performance (high value, low error), and the grey dashed lines represent the general expectation on the relationship between forecast accuracy and value.

-L444: Please explain what the “perfect forecast” is in the caption and/or early on in the text.

→ We will include explanations of the perfect forecast both at the beginning of the text and in the caption (see the modified Figure 6 as shown above).

-L475: Except for the Soyanggang-Chungju earlier event.

→ The results from Soyanggang-Chungju reservoir system also show no significant difference in value between ensemble forecasts (ESP and SFFs). To avoid confusion, we will improve this sentence.

-L497: I don't understand why the method that prioritizes storage (over supply?) is more suitable for high risks linked with supply deficit. Could you please elaborate a bit for readers not as familiar with reservoir management?

→ The storage-prioritized method typically results in smaller supply deficits over longer periods, which helps prevent extreme storage shortage. Conversely, the supply-prioritized method tends to supply more than the storage-prioritized method. As a result, it carries a higher risk of extreme supply deficits over shorter periods when storage levels fall significantly, potentially leading to operational failure. We will add more explanations in the manuscript.

-L503-508: This is a repetition of the first discussion paragraph. Please consider combining both.

→ We agree with your suggestion. We will relocate this paragraph to follow the first paragraph in the discussion section and revise it to avoid repetition.

Technical corrections:

-L181: “analyzing” instead of “comparing”? → [We will modify this.](#)

-L249: Pareto. → [We will modify this.](#)

-L335: “outperforms” instead of “outperforming”. → [We will modify this.](#)

-L406: “forecast” instead of “forecasts”. → [It will be modified.](#)

## References

Johnson, F. and Sharma, A. (2012). A nesting model for bias correction of variability at multiple time scales in general circulation model precipitation simulations. *Water Resources Research*, 48(1). doi:<https://doi.org/10.1029/2011wr010464>.

Lee, Y., Pianosi, F., Peñuela, A. and Rico-Ramirez, M. A.: Skill of seasonal flow forecasts at catchment-scale: an assessment across South Korea, *Hydrology and Earth System Science*, 28, 3261–3279, <https://doi.org/10.5194/hess-28-3261-2024>, 2024.

Peñuela, A., Hutton, C. and Pianosi, F.: Assessing the value of seasonal hydrological forecasts for improving water resource management: insights from a pilot application in the UK, *Hydrology and Earth System Sciences*, 24(12), 6059–6073, <https://doi.org/10.5194/hess-24-6059-2020>, 2020.

Maraun, D., Wetterhall, F., Ireson, A.M., Chandler, R.E., Kendon, E.J., Widmann, M., Brienen, S., Rust, H.W., Sauter, T., Themeßl, M., Venema, V.K.C., Chun, K.P., Goodess, C.M., Jones, R.G., Onof, C., Vrac, M. and Thiele-Eich, I. (2010). Precipitation downscaling under climate change: Recent developments to bridge the gap between dynamical models and the end user. *Reviews of Geophysics*, 48(3). doi:<https://doi.org/10.1029/2009rg000314>.
